# Supplementary material for: Understanding cation-disordered rocksalt oxyfluoride cathodes
Source: Royal Society of Chemistry journal article supplement (doi:10.1039/d0ta12179g), 2021-01-01
Supplement: d0ta12179g1.pdf [file d0ta12179g1.pdf]

## Understanding Cation-Disordered Rocksalt Oxyfluoride Cathodes

*Dongchang Chen,<sup>a</sup> Juhyeon Ahn,<sup>a</sup> Ethan Self,<sup>b</sup> Jagjit Nanda<sup>b</sup> and Guoying Chen<sup>a,\*</sup>*

*<sup>a.</sup> Energy Storage and Distributed Resources Division, Lawrence Berkeley National Laboratory,  
Berkeley, California 94720, USA*

*<sup>b.</sup> Chemical Science Division, Oak Ridge National laboratory, Oak Ridge, TN 37831 USA*

*\* Corresponding author's email: [gchen@lbl.gov](mailto:gchen@lbl.gov)*

## Supporting Information

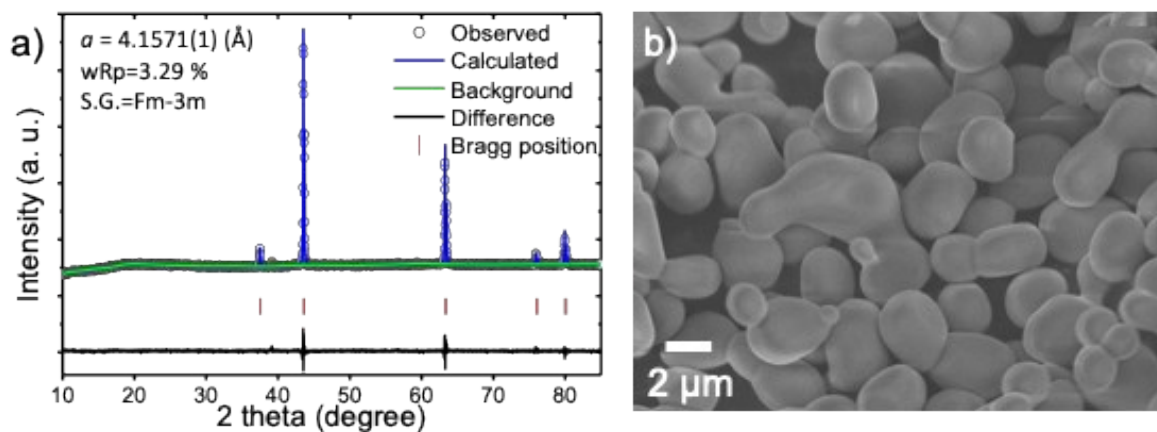

Figure S1. a) XRD pattern and b) SEM image collected on pristine LTMO<sub>3.0</sub>.

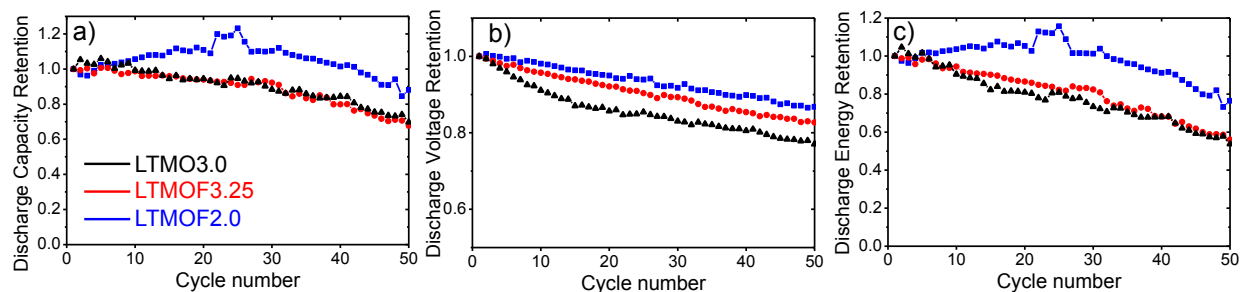

Figure S2. Comparison of discharge retention in: a) capacity, b) voltage and c) energy of LTMO<sub>3.0</sub>, LTMOF<sub>3.25</sub> and LTMOF<sub>2.0</sub> cathodes. The current density was 10 mA/g.

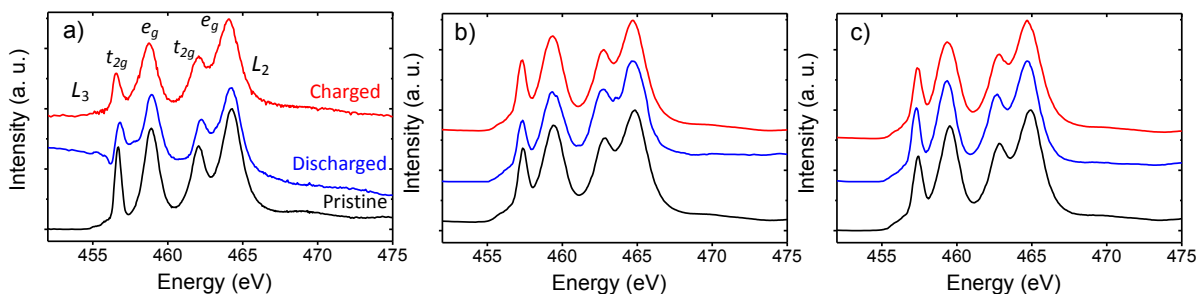

Figure S3. Ti *L*-edge XAS profiles collected on pristine, 1<sup>st</sup> charged (4.8 V) and 1<sup>st</sup> discharged (1.5 V) electrodes: a) LTMO3.0, b) LTMOF3.25 and c) LTMOF2.0

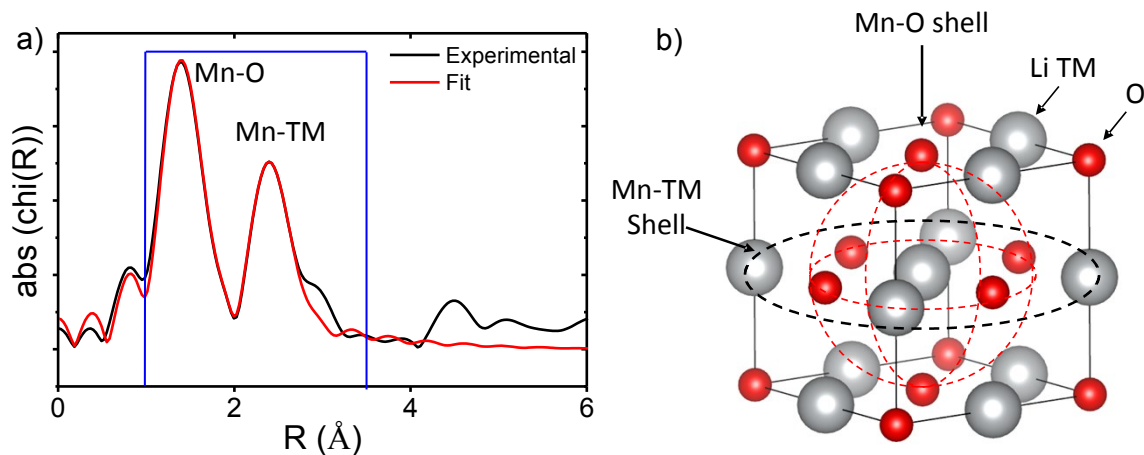

Figure S4. a) EXAFS profile and profile fitting of LTMOF3.25 using the first and second shells only and b) rocksalt structural model used for the fitting. The blue window in a) indicates the R range for the fitting.

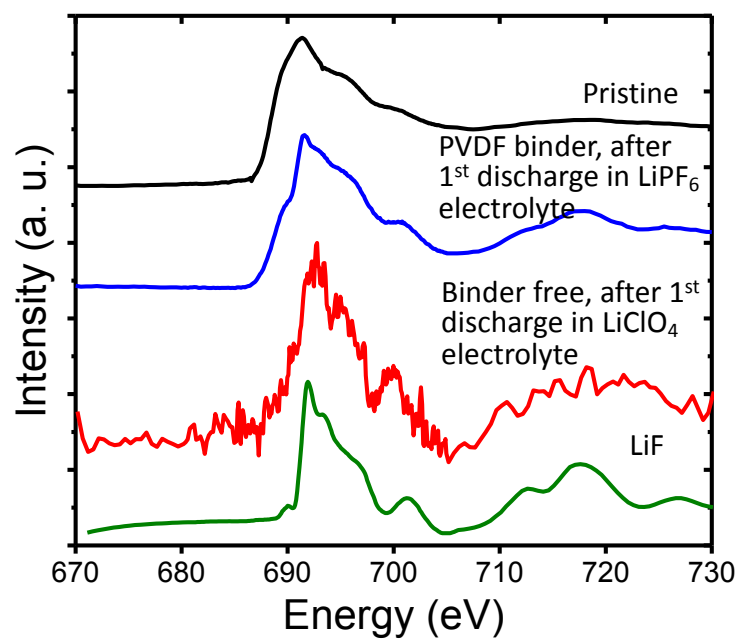

Figure S5. Comparison of F *K*-edge XAS profiles collected on LiF reference and LTMOF2.0 cathodes as indicated.

**Table S1.** Structural parameters of pristine LTMO3.0, LTMOF3.25 and LTMOF2.0 crystal samples determined from Rietveld refinement of X-ray diffraction patterns. Chemical compositions were determined by combined ICP and F-ISE measurements.

**Li<sub>1.2</sub>Ti<sub>0.4</sub>Mn<sub>0.4</sub>O<sub>2</sub> (LTMO3.0)**, Li: Ti: Mn = 1.197: 0.393: 0.410,  $Fm\bar{3}m$ ,  $a$  (Å) = 4.1571

| Atom | Position  | Wyck. Site | Occupancy | d(M-O) (Å) |
|------|-----------|------------|-----------|------------|
| Li   | 0, 0, 0   | 4a         | 0.56      | 2.0784     |
| Ti   | 0, 0, 0   | 4a         | 0.22      | 2.0784     |
| Mn   | 0, 0, 0   | 4a         | 0.22      | 2.0784     |
| O    | 0, 0, 0.5 | 4b         | 1.0       | -          |

**Li<sub>1.3</sub>Ti<sub>0.3</sub>Mn<sub>0.4</sub>O<sub>1.7</sub>F<sub>0.3</sub> (LTMOF3.25)**, Li: Ti :Mn :F = 1.316: 0.282: 0.401: 0.33,  $Fm\bar{3}m$ ,  $a$  (Å) = 4.1577

| Atom | Position  | Wyck. site | Occupancy | d(M-O) (Å) |
|------|-----------|------------|-----------|------------|
| Li   | 0, 0, 0   | 4a         | 0.65      | 2.0781     |
| Ti   | 0, 0, 0   | 4a         | 0.12      | 2.0781     |
| Mn   | 0, 0, 0   | 4a         | 0.23      | 2.0781     |
| O    | 0, 0, 0.5 | 4b         | 0.82      | -          |
| F    | 0, 0, 0.5 | 4b         | 0.18      | -          |

**Li<sub>1.2</sub>Ti<sub>0.2</sub>Mn<sub>0.6</sub>O<sub>1.8</sub>F<sub>0.2</sub> (LTMOF2.0)**, Li: Ti: Mn: F = 1.191: 0.201: 0.605: 0.19,  $Fm\bar{3}m$ ,  $a$  (Å) = 4.1572

| Atom | Position  | Wyck. Site | Occupancy | d(M-O) (Å) |
|------|-----------|------------|-----------|------------|
| Li   | 0, 0, 0   | 4a         | 0.60      | 2.0781     |
| Ti   | 0, 0, 0   | 4a         | 0.10      | 2.0781     |
| Mn   | 0, 0, 0   | 4a         | 0.30      | 2.0781     |
| O    | 0, 0, 0.5 | 4b         | 0.92      | -          |
| F    | 0, 0, 0.5 | 4b         | 0.08      | -          |
